# Supplementary material for: Dually crosslinkable SiO2@polysiloxane core–shell nanoparticles for flexible gate dielectric insulators
Source: Royal Society of Chemistry journal article supplement (doi:10.1039/c6ra28230j), 2017-01-01
Supplement: c6ra28230j1.pdf [file c6ra28230j1.pdf]

## Supporting Information

### **Dually Crosslinkable SiO<sub>2</sub>@Polysiloxane Core-Shell Nanoparticles for Flexible Gate Dielectric Insulators**

Eunkyung Lee<sup>a,c</sup>, Jiyoung Jung<sup>a</sup>, Ajeong Choi<sup>a</sup>, Xavier Bulliard<sup>a</sup>, Jung-Hwa Kim<sup>b</sup>, Youngjun Yun<sup>a</sup>, Jooyoung Kim<sup>a</sup>, Jeongil Park<sup>a</sup>, Sangyoon Lee<sup>a</sup>, Youngjong Kang<sup>\*c</sup>

<sup>a</sup> Material research center, Samsung Electronics, 130, Samsung-ro, Yeongtong-gu, Suwon-si, Gyeonggi-do, 443-803, Korea.

<sup>b</sup> Platform Technology Lab, Samsung Electronics, 130, Samsung-ro, Yeongtong-gu, Suwon-si, Gyeonggi-do, 443-803, Korea.

<sup>c</sup> Department of Chemistry, Research Institute for Natural Sciences, Institute of Nano Science and Technology, Hanyang University, 222 Wangsimni-Ro, Seongdong-Gu, Seoul, 133-791, Korea  
e-mail: youngjkang@hanyang.ac.kr

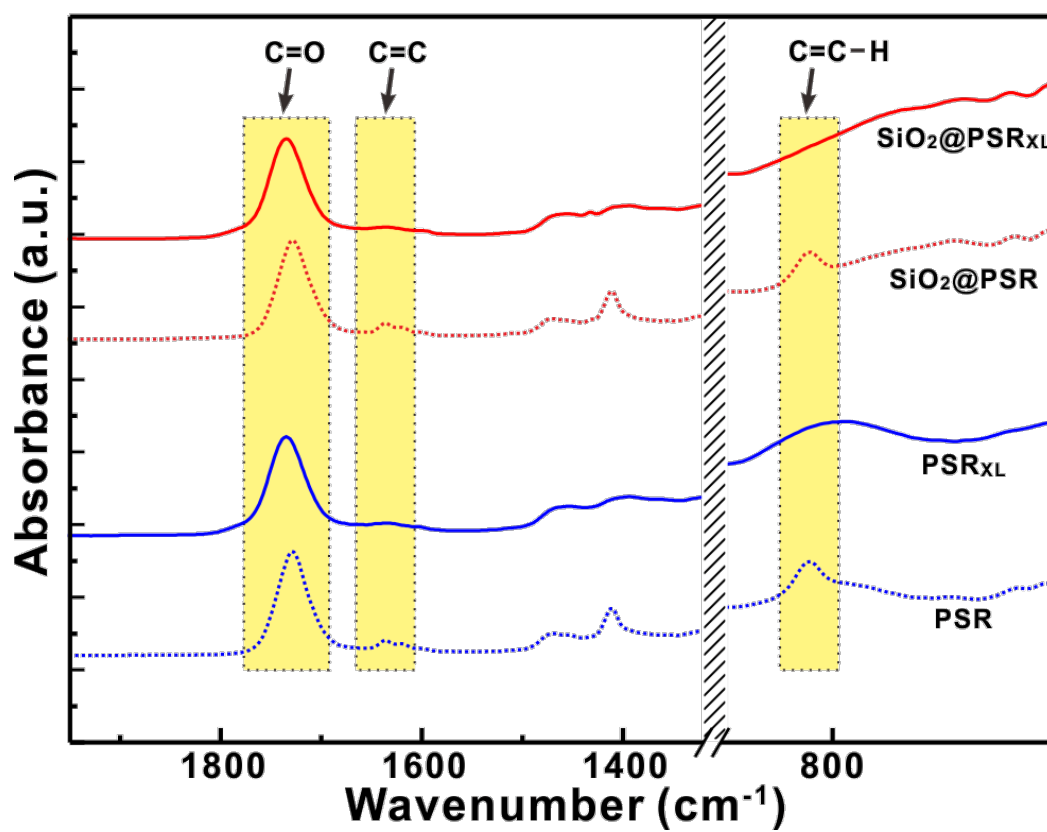

**Figure S1.** FT-IR spectra of PSR, PSR<sub>XL</sub>, SiO<sub>2</sub>@PSR and SiO<sub>2</sub>@PSR<sub>XL</sub>. The peaks at 1637 cm<sup>-1</sup> and 810 cm<sup>-1</sup> assigned to ethylene group of MPTS disappeared after photo-crosslinking process, while the carbonyl peak at 1727 cm<sup>-1</sup> was slightly shifted to 1733 cm<sup>-1</sup> with the same intensity.

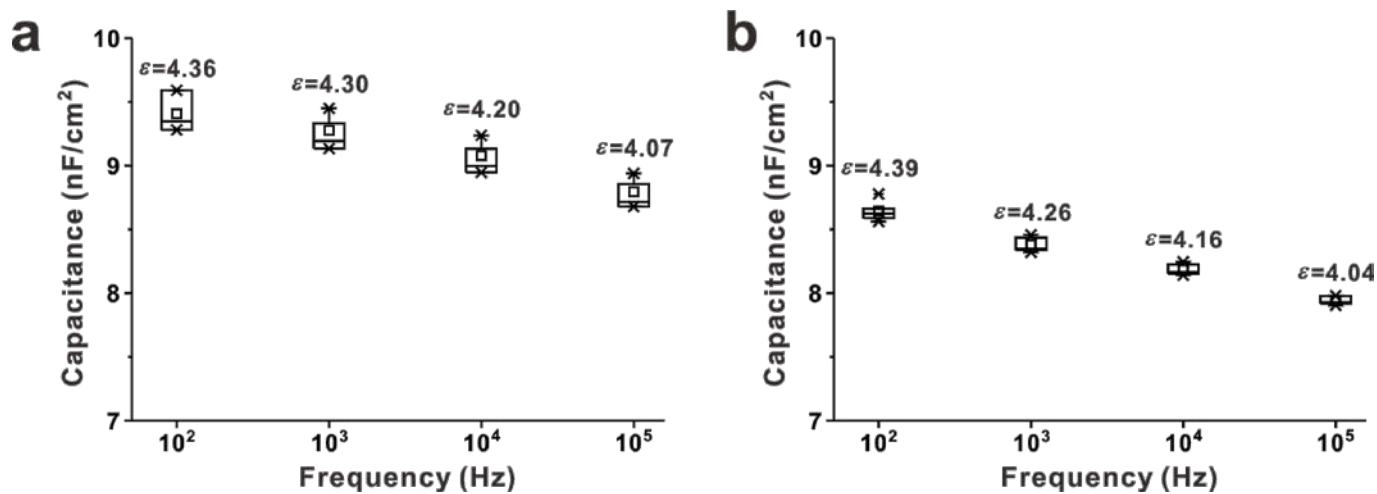

**Figure S2.** The changes of capacitance and dielectric constant as a function of frequency for the MIM devices based on a) PSR<sub>XL</sub> and b) SiO<sub>2</sub>@PSR<sub>XL</sub>. The layer thickness of PSR<sub>XL</sub> and SiO<sub>2</sub>@PSR<sub>XL</sub> was 4100 Å and 4500 Å, respectively.

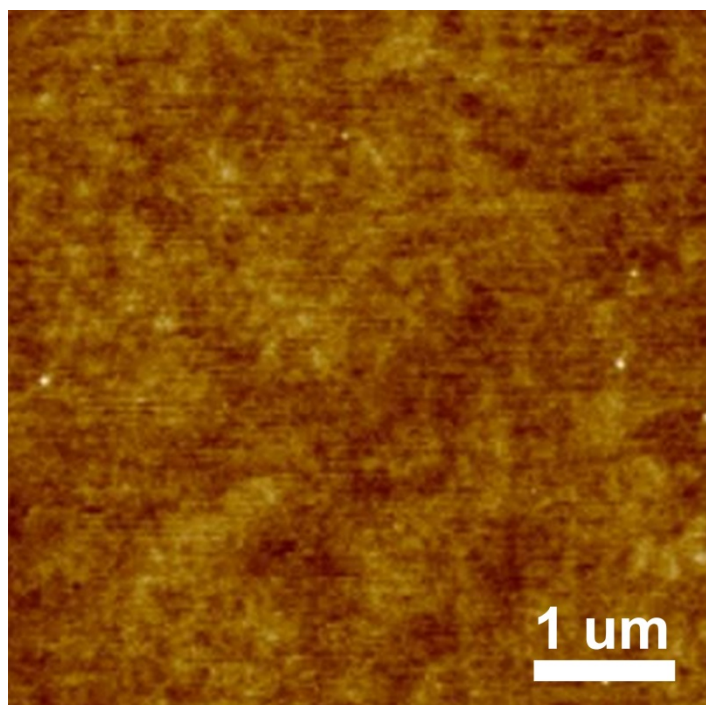

**Figure S3.** AFM micrograph of SiO<sub>2</sub>@PSR<sub>XL</sub> film coated on a glass substrate. The RMS roughness is 4.5 Å.
